# Supplementary material for: Transcriptome analysis provides StMYBA1 gene that regulates potato anthocyanin biosynthesis by activating structural genes
Source: Front Plant Sci. 2023 Jan 20;14:1087121. doi: 10.3389/fpls.2023.1087121 (PMC9895859; doi:10.3389/fpls.2023.1087121)
Supplement: Supplementary file 2 [file Table_2.xls]

## Sheet: Sheet1
MergedKey	ANsrelatedannotation.txt.V1		0-1	0-2	0-3	6-1	6-2	6-3	36-1	36-2	48-1	48-2	48-3
Soltu.DM.01G024670.1	MYB	Soltu.DM.01G024670.1MYB	0.194243	0.150254	0.547561	340.312	292.983	289.43	4.07974	2.49608	10.5116	9.09433	5.48914	AT2G47460.1	1e-72	myb domain protein 12
Soltu.DM.01G051040.1	MYB	Soltu.DM.01G051040.1MYB	3.15442	2.24909	2.16139	33.5532	38.0265	38.508	9.21911	7.60983	6.45996	4.09119	5.10876	AT4G38620.1	1e-109	myb domain protein 4
Soltu.DM.03G034270.1	MYB	Soltu.DM.03G034270.1MYB	11.6168	5.39413	7.81431	47.1938	49.1524	51.9008	23.9228	21.5095	23.7337	20.5027	18.1362	AT1G49010.1	1e-96	MYB family protein
Soltu.DM.06G000090.1	MYB	Soltu.DM.06G000090.1MYB	0	0	0	9.04069	8.53502	11.1729	2.22469	1.92585	7.56578	5.53688	1.63326	AT5G49330.1	7e-71	myb domain protein 111
Soltu.DM.10G017480.1	MYB	Soltu.DM.10G017480.1MYB	9.16812	7.08318	5.18158	38.2288	47.8256	42.4609	10.1236	9.50209	8.3478	10.2657	8.99159	AT4G38620.1	1e-111	myb domain protein 4
Soltu.DM.10G020780.1	MYB	Soltu.DM.10G020780.1MYB	3.8368	2.26743	1.05889	160.753	173.703	150	34.1407	33.9124	104.572	88.3296	87.3189	AT1G66370.1	1e-65	myb domain protein 113
Soltu.DM.10G020840.1	MYB	Soltu.DM.10G020840.1MYB	26.1939	18.6598	16.852	129.476	135.375	123.7	143.013	116.598	234.557	223.501	219.178	AT1G66370.1	5e-63	myb domain protein 113
Soltu.DM.11G026620.2	MYB	Soltu.DM.11G026620.2MYB	183.025	106.563	85.3614	767.884	774.674	653.339	154.957	144.506	276.639	250.592	191.455	AT3G46130.1	1e-72	myb domain protein 48
Soltu.DM.12G009080.1	MYB	Soltu.DM.12G009080.1MYB	0	0	0	6.53506	7.33053	3.36926	0.908361	0.907356	7.8184	7.77038	6.56108	AT2G47460.1	4e-68	myb domain protein 12
Soltu.DM.05G004700.1	MYB	Soltu.DM.05G004700.1MYB	0	1.14268	0.138606	0.479513	0.29281	0.716745	1.25971	0.444025	15.9561	10.2377	14.6824	AT1G22640.1	3e-72	myb domain protein 3
Soltu.DM.12G023200.1	MYB_related	Soltu.DM.12G023200.1MYB_related	0	0	0	35.544	51.5576	24.9015	20.231	18.7935	105.622	78.379	90.9187	AT1G01380.1	9e-19	MYB_related family protein
Soltu.DM.12G025790.1	MYB_related	Soltu.DM.12G025790.1MYB_related	0	0	0	1.27406	1.46521	1.14654	3.77438	2.02758	4.07422	3.32372	4.62151	AT5G56840.1	1e-53	MYB_related family protein
Soltu.DM.03G019030.1	MYB_related	Soltu.DM.03G019030.1MYB_related	10.3907	7.16151	4.35462	17.5235	17.7408	18.2422	26.7076	28.2982	30.933	41.2618	22.6301	AT1G18330.1	3e-43	MYB_related family protein
Soltu.DM.04G000120.2	MYB_related	Soltu.DM.04G000120.2MYB_related	4.11241	4.1942	3.86548	1.21352	3.72313	1.63862	14.7237	11.9239	13.0308	9.50298	17.0383	AT1G70000.2	7e-57	MYB_related family protein
Soltu.DM.07G017910.2	MYB_related	Soltu.DM.07G017910.2MYB_related	0	0	0	0	0.171019	0	0.518178	0.431895	3.83421	3.75513	5.34231	AT1G01380.1	3e-14	MYB_related family protein
Soltu.DM.01G031430.2	bHLH	Soltu.DM.01G031430.2bHLH	1.31859	0.464669	0.339034	9.09609	7.61755	9.61428	4.37616	7.81379	6.06527	5.77072	5.41894	AT4G00050.1	1e-100	bHLH family protein
Soltu.DM.02G017550.1	bHLH	Soltu.DM.02G017550.1bHLH	4.4658	2.43343	3.1992	24.8178	28.2296	22.1557	3.23118	2.89484	3.49333	2.08055	10.01	AT4G20970.1	9e-41	bHLH family protein
Soltu.DM.03G032550.1	bHLH	Soltu.DM.03G032550.1bHLH	0.576279	0.089367	0.108682	1.62443	1.7307	1.24041	1.53089	1.46225	1.02936	1.61899	0.640266	AT3G26744.1	1e-116	bHLH family protein
Soltu.DM.02G006490.1	bHLH	Soltu.DM.02G006490.1bHLH	3.36904	2.19572	2.00091	6.71678	6.80333	4.92518	8.1828	11.768	10.1301	14.6834	10.1846	AT2G18300.2	1e-55	bHLH family protein
Soltu.DM.04G031540.1	bHLH	Soltu.DM.04G031540.1bHLH	1.229	1.18981	1.15692	1.66376	1.2269	1.3495	12.0312	12.2371	15.634	21.3506	20.6159	AT5G65640.1	4e-87	beta HLH protein 93
Soltu.DM.05G006790.1	bHLH	Soltu.DM.05G006790.1bHLH	0.138657	0.107437	0.130612	0.150229	0.277141	0.203193	0.741703	0.842632	0.412302	0.694125	0.109681	AT1G59640.1	5e-98	BIG PETAL P
Soltu.DM.06G009770.1	bHLH	Soltu.DM.06G009770.1bHLH	0.493048	1.51194	0.228616	3.43807	3.60253	5.65491	3.13353	3.87363	3.96113	2.86911	2.60226	AT2G40200.1	4e-46	bHLH family protein
Soltu.DM.09G019660.1	bHLH	Soltu.DM.09G019660.1bHLH	0.182215	0	0.215008	0	0.13705	0.223183	0.653492	0.648687	7.73944	4.94721	3.84495	AT4G09820.1	7e-94	bHLH family protein
Soltu.DM.08G022630.1	bHLH	Soltu.DM.08G022630.1bHLH	1.34473	0.910891	0.869718	0.090984	0.083813	0	2.60271	3.18387	6.86244	5.53883	8.07785	AT5G46690.1	2e-79	beta HLH protein 71
Soltu.DM.01G031000.2	ERF	Soltu.DM.01G031000.2ERF	4.54322	4.60014	6.24527	32.0191	30.6078	26.1164	117.818	84.1866	88.2234	75.7557	97.7598	AT2G44840.1	3e-33	ethylene-responsive element binding factor 13
Soltu.DM.04G015510.1	ERF	Soltu.DM.04G015510.1ERF	0	0	0	2.28852	2.23727	0.958242	1.13305	0.919036	1.66956	2.23549	2.41227	AT1G24590.1	2e-40	DORNROSCHEN-like
Soltu.DM.03G035540.1	ERF	Soltu.DM.03G035540.1ERF	0.811032	0.627204	1.1427	26.8624	31.7662	25.8455	4.76688	4.03294	2.70438	3.02734	5.24615	AT5G11590.1	4e-56	ERF family protein
Soltu.DM.05G022060.1	ERF	Soltu.DM.05G022060.1ERF	3.98153	1.84397	4.47534	2.86569	4.33692	5.40281	20.5822	18.8753	21.96	33.3651	33.2208	AT5G07580.1	9e-50	ERF family protein
Soltu.DM.12G026580.1	ERF	Soltu.DM.12G026580.1ERF	0.928521	0.179357	0.326632	0.87796	0.230417	0.901846	2.2807	2.15687	2.06107	0.691337	4.16927	AT1G15360.1	3e-73	ERF family protein
Soltu.DM.11G001300.1	ERF	Soltu.DM.11G001300.1ERF	0	6.45535	0.780106	3.01152	7.90711	5.35373	17.4622	14.1416	9.00752	7.59146	14.2894	AT3G23240.1	1e-47	ethylene response factor 1
Soltu.DM.04G028130.1	WRKY	Soltu.DM.04G028130.1WRKY	0.2548	0	0.238781	9.90609	10.2265	8.15535	0	0.127718	1.1299	0.7573	0	AT5G64810.1	1e-36	WRKY DNA-binding protein 51
Soltu.DM.08G012710.1	WRKY	Soltu.DM.08G012710.1WRKY	0	1.14767	0.173828	6.61306	6.96225	5.20635	0.09242	0.092505	1.096	0.731125	0	AT5G26170.1	2e-40	WRKY DNA-binding protein 50
Soltu.DM.08G015900.1	WRKY	Soltu.DM.08G015900.1WRKY	1.36638	2.95244	1.66326	28.9071	28.6683	23.695	0.205542	0.341894	0.605356	0	0	AT1G80840.1	8e-61	WRKY DNA-binding protein 40
Soltu.DM.08G015910.2	WRKY	Soltu.DM.08G015910.2WRKY	0.729616	0.84688	0.514458	6.11891	4.9062	5.50912	0.231111	0.138024	0.135299	0	0.143416	AT1G80840.1	7e-65	WRKY DNA-binding protein 40
Soltu.DM.10G023760.1	WRKY	Soltu.DM.10G023760.1WRKY	1.64943	2.04663	2.12615	13.5331	17.1242	13.3988	13.6313	12.7013	48.8716	40.8785	29.6922	AT2G37260.1	1e-84	WRKY family protein
Soltu.DM.01G024980.1	WRKY	Soltu.DM.01G024980.1WRKY	13.3482	7.74837	10.4884	28.4192	27.3959	25.6786	34.7431	32.0042	23.3276	25.4121	22.8068	AT1G29280.1	2e-34	WRKY DNA-binding protein 65
Soltu.DM.02G031400.1	WRKY	Soltu.DM.02G031400.1WRKY	0.133737	0.207279	0.693025	0.289835	0.935908	0.26139	1.09074	1.38902	1.19331	2.14334	1.48205	AT1G13960.1	1e-104	WRKY DNA-binding protein 4
Soltu.DM.01G048710.1	B3	Soltu.DM.01G048710.1B3	3.04789	3.75965	2.56494	15.4486	21.669	21.6605	132.889	131.269	182.618	153.007	180.759	AT4G31640.1	6e-12	B3 family protein
Soltu.DM.09G002750.1	B3	Soltu.DM.09G002750.1B3	8.60228	7.5503	6.37873	68.3482	69.5999	69.6952	11.6495	10.8066	22.4895	16.4837	13.5319	AT2G36080.1	6e-69	B3 family protein
Soltu.DM.08G011730.1	bZIP	Soltu.DM.08G011730.1bZIP	13.3578	11.8446	12.1743	262.521	244.904	238.233	12.4413	8.56108	13.7168	8.82842	18.3131	AT5G11260.1	1e-65	bZIP family protein
Soltu.DM.02G005680.1	bZIP	Soltu.DM.02G005680.1bZIP	0.242071	0	0.11349	0.392272	0.360168	0.704913	1.4619	0.789579	1.07413	0.480196	0.566335	AT2G17770.2	2e-38	basic region/leucine zipper motif 27
Soltu.DM.09G003280.1	bZIP	Soltu.DM.09G003280.1bZIP	6.63831	3.93362	2.59592	31.0947	27.1474	29.5715	4.96767	5.72902	13.9242	13.1932	9.51797	AT1G19490.1	7e-29	bZIP family protein
Soltu.DM.12G007270.3	bZIP	Soltu.DM.12G007270.3bZIP	7.63606	4.56061	3.18569	26.1552	31.4943	32.0095	6.45141	6.02972	7.44965	8.53311	8.23414	AT1G77920.1	1e-149	bZIP family protein
Soltu.DM.06G028080.1	HSF	Soltu.DM.06G028080.1HSF	2.15957	1.00492	1.06945	18.3	15.6821	15.1669	5.5763	4.22209	7.0746	5.85427	5.14669	AT5G16820.2	1e-130	heat shock factor 3
Soltu.DM.07G011880.1	HSF	Soltu.DM.07G011880.1HSF	9.93417	8.9023	8.22439	111.537	88.3754	90.8745	26.5462	25.6578	33.4436	33.2397	30.2414	AT2G26150.1	3e-81	heat shock transcription factor A2
Soltu.DM.02G006190.1	GATA	Soltu.DM.02G006190.1GATA	0.586648	0.756295	0.734949	4.65369	7.00636	4.8543	2.22644	1.87212	1.59449	0.973874	1.22779	AT5G66320.2	8e-58	GATA transcription factor 5
Soltu.DM.03G003830.1	GATA	Soltu.DM.03G003830.1GATA	0.980426	0.755369	0.915869	4.57895	6.28284	4.10231	6.18845	3.90687	7.94226	4.50364	4.03117	AT5G66320.2	1e-56	GATA transcription factor 5
Soltu.DM.12G001590.1	GATA	Soltu.DM.12G001590.1GATA	14.4786	19.3779	16.7187	86.3914	113.299	108.346	81.4295	78.361	69.063	98.517	88.7584	AT3G06740.1	7e-36	GATA transcription factor 15
Soltu.DM.11G022960.1	GATA	Soltu.DM.11G022960.1GATA	13.1752	9.43557	9.14233	40.2967	41.5618	44.3347	31.9094	27.6675	33.9905	36.8477	36.8648	AT1G08010.2	6e-47	GATA transcription factor 11
Soltu.DM.03G005770.1	AP2	Soltu.DM.03G005770.1AP2	2.04942	0.585581	0.712214	6.3382	6.37429	6.86219	2.15095	2.10883	1.36524	1.40788	1.4567	AT4G36920.1	1e-125	AP2 family protein
Soltu.DM.03G013210.2	LBD	Soltu.DM.03G013210.2LBD	3.28382	0.460392	0.418827	9.17701	9.5846	9.38475	15.522	13.565	9.46667	7.95405	9.70312	AT3G11090.1	8e-60	LOB domain-containing protein 21
Soltu.DM.03G024640.1	Trihelix	Soltu.DM.03G024640.1Trihelix	7.80741	6.3735	4.44574	51.3649	49.9778	53.253	25.2191	33.0247	39.6792	44.1846	21.8597	AT5G63420.1	0	Trihelix family protein
Soltu.DM.04G000840.1	NAC	Soltu.DM.04G000840.1NAC	0.170628	0.132081	0.240748	1.66232	0.765564	2.82816	0.562879	0.732403	1.13975	0.511012	0.671876	AT1G69490.1	1e-113	NAC-like, activated by AP3/PI
Soltu.DM.06G025800.1	NAC	Soltu.DM.06G025800.1NAC	0	0	0	0.793699	1.4637	1.14478	0	0.074162	0.108896	0	0	AT5G61430.1	1e-126	NAC domain containing protein 100
Soltu.DM.05G003170.1	CO-like	Soltu.DM.05G003170.1CO-like	0.398852	0	0.250536	4.17799	5.38337	4.80751	6.23851	5.65853	8.00778	8.25719	4.84151	AT1G25440.1	1e-97	B-box type zinc finger protein with CCT domain
Soltu.DM.05G005450.1	ZF-HD	Soltu.DM.05G005450.1ZF-HD	0.951193	0.859338	0.96981	4.63499	5.61625	5.33667	0.684873	1.08193	2.47238	1.10905	1.25058	AT5G15210.1	2e-63	homeobox protein 30
Soltu.DM.05G006310.1	Whirly	Soltu.DM.05G006310.1Whirly	5.57951	5.71066	5.07688	37.3975	37.5682	39.2856	13.3215	12.1692	21.3632	20.4658	15.147	AT2G02740.2	1e-113	ssDNA-binding transcriptional regulator
Soltu.DM.06G009920.1	M-type_MADS	Soltu.DM.06G009920.1M-type_MADS	0	0.623137	0	48.5546	58.688	48.287	7.42491	6.36626	14.2454	9.26597	20.5443	AT1G65300.1	4e-29	AGAMOUS-like 38
Soltu.DM.06G018000.1	C2H2	Soltu.DM.06G018000.1C2H2	0	0.105014	0.446854	0.807621	2.91248	1.258	1.1741	1.4073	0.604546	0.542883	0.9652	AT3G60580.1	1e-45	C2H2-like zinc finger protein
Soltu.DM.06G025430.2	MIKC_MADS	Soltu.DM.06G025430.2MIKC_MADS	42.7956	37.9125	30.9463	225.17	245.31	241.056	51.1628	43.4977	59.7231	59.7149	48.8374	AT5G60910.1	1e-103	AGAMOUS-like 8
Soltu.DM.07G020030.1	SBP	Soltu.DM.07G020030.1SBP	1.37748	1.48811	1.41867	49.2111	50.4772	49.1026	86.1087	63.4071	81.7677	78.1869	100.518	AT3G15270.1	1e-42	squamosa promoter binding protein-like 5
Soltu.DM.08G009980.2	TALE	Soltu.DM.08G009980.2TALE	10.9439	10.4611	9.59	56.6078	58.6684	57.5673	10.4798	12.6149	23.2921	25.7279	19.1226	AT5G25220.2	0	KNOTTED1-like homeobox gene 3
Soltu.DM.08G023050.2	ARR-B	Soltu.DM.08G023050.2ARR-B	27.898	24.3072	22.1776	210.744	196.044	194.468	93.6002	103.875	110.909	126.362	77.4747	AT4G18020.3	1e-128	ARR-B family protein
Soltu.DM.08G028390.1	AP2	Soltu.DM.08G028390.1AP2	0.070255	0	0.199141	0.838898	1.72877	1.37861	0.829935	1.34236	1.20534	0.849375	0.168314	AT1G68550.1	5e-12	ERF family protein
Soltu.DM.09G023920.1	GATA	Soltu.DM.09G023920.1GATA	0.853755	1.31161	1.58809	18.1224	16.5048	15.567	3.04901	2.4242	0.938426	2.08228	1.94826	AT5G49300.1	8e-24	GATA transcription factor 16
Soltu.DM.10G003970.3	G2-like	Soltu.DM.10G003970.3G2-like	1.13305	2.95622	1.74929	38.7084	37.4691	35.6021	8.6689	8.97459	20.3278	18.3135	17.7688	AT2G20570.1	3e-64	GBF's pro-rich region-interacting factor 1
Soltu.DM.11G018260.1	Nin-like	Soltu.DM.11G018260.1Nin-like	0	0.833538	0.503783	7.12206	3.6995	5.93409	1.63335	2.18461	1.98323	0	2.01945	AT4G24020.1	5e-16	NIN like protein 7
Soltu.DM.11G018300.1	Nin-like	Soltu.DM.11G018300.1Nin-like	0.127375	0.098728	0.68049	1.96631	2.29343	1.88752	0.507623	0.626162	0.947536	1.02165	0.402873	AT1G76350.1	1e-22	Nin-like family protein
Soltu.DM.S001710.1	M-type_MADS	Soltu.DM.S001710.1M-type_MADS	2.65838	0	0.984439	49.4884	50.836	47.0087	16.643	7.48664	9.24449	9.77828	24.4811	AT5G26630.1	2e-29	M-type_MADS family protein
Soltu.DM.02G009820.1	ZF-HD	Soltu.DM.02G009820.1ZF-HD	0.695932	1.34665	0.409076	1.69484	1.73428	1.18719	2.64793	2.85458	1.16196	1.21544	1.7804	AT5G15210.1	2e-68	homeobox protein 30
Soltu.DM.03G034030.1	CO-like	Soltu.DM.03G034030.1CO-like	0.318803	0.49373	1.0501	2.58905	2.94264	2.79946	21.2643	22.7627	28.5279	40.1417	21.2482	AT1G68520.1	1e-90	B-box type zinc finger protein with CCT domain
Soltu.DM.04G002000.1	CO-like	Soltu.DM.04G002000.1CO-like	2.73512	1.44979	1.22012	3.04091	4.02664	2.95238	9.12467	8.27044	7.91684	8.06726	5.91694	AT1G25440.1	6e-97	B-box type zinc finger protein with CCT domain
Soltu.DM.08G022900.1	LSD	Soltu.DM.08G022900.1LSD	22.2761	21.1536	10.5679	76.5545	92.2227	75.9562	130.609	187.113	107.767	113.995	92.7468	AT1G32540.3	8e-84	lsd one like 1
Soltu.DM.09G004490.1	Trihelix	Soltu.DM.09G004490.1Trihelix	18.1888	18.7114	20.522	44.3728	42.9501	43.1311	76.8397	67.2195	113.173	156.381	99.3916	AT3G10040.1	1e-102	sequence-specific DNA binding transcription factors
Soltu.DM.12G002760.1	G2-like	Soltu.DM.12G002760.1G2-like	2.71416	3.08051	2.63693	2.34975	2.97456	3.87876	11.8319	9.95075	6.97974	8.6624	8.39554	AT4G13640.1	1e-101	G2-like family protein
Soltu.DM.02G025760.1	LBD	Soltu.DM.02G025760.1LBD	5.02361	3.46958	4.33426	3.98506	2.61838	3.20363	12.2761	5.56159	30.0789	44.7537	51.8024	AT3G02550.1	2e-95	LOB domain-containing protein 41
Soltu.DM.03G032480.1	Trihelix	Soltu.DM.03G032480.1Trihelix	0.260342	1.60787	0.243914	3.23277	1.80526	2.77661	1.76499	2.21735	1.92358	5.15589	2.43025	AT2G33550.1	4e-56	Trihelix family protein
Soltu.DM.07G027240.2	NF-YB	Soltu.DM.07G027240.2NF-YB	12.6712	10.2796	9.65607	31.6723	37.9032	33.7452	36.0549	28.7526	32.7776	48.155	38.248	AT4G14540.1	2e-73	nuclear factor Y, subunit B3
Soltu.DM.12G001040.3	GRAS	Soltu.DM.12G001040.3GRAS	4.01251	4.71308	3.9545	11.4008	11.0108	8.97815	10.8312	12.9507	16.5553	21.4593	12.9189	AT1G50420.1	0	scarecrow-like 3
Soltu.DM.09G005720.1	PAL	Soltu.DM.09G005720.1PAL	6.42936	6.1284	5.35407	16.7004	19.5612	17.5663	12.4652	93.5802	21.05	23.6708	10.3395
Soltu.DM.09G005690.1	PAL	Soltu.DM.09G005690.1PAL	825.533	714.555	752.822	1820.15	1666.65	1590.24	5539.59	4691.93	9537.28	10529.9	5604.66
Soltu.DM.09G005700.1	PAL	Soltu.DM.09G005700.1PAL	171.743	162.154	168.756	1172.97	1012.35	978.969	302.011	443.304	590.562	504.205	315.885
Soltu.DM.03G011450.1	PAL	Soltu.DM.03G011450.1PAL	42.4985	4.7954	5.71254	19.6579	17.1772	26.6308	15.248	7.21	56.9078	51.2598	10.6751
Soltu.DM.03G004870.1	PAL	Soltu.DM.03G004870.1PAL	52.7926	58.5719	59.2681	41.6711	40.7428	28.8832	6.857	10.5684	11.932	6.00929	6.37111
Soltu.DM.03G004900.1	PAL	Soltu.DM.03G004900.1PAL	159.095	146.28	161.547	90.0997	86.5507	68.0086	20.079	60.6342	37.2271	20.5541	16.5801
Soltu.DM.03G004920.2	PAL	Soltu.DM.03G004920.2PAL	73.6853	80.487	83.714	41.2988	44.4375	29.8473	7.97309	87.6284	17.7604	13.881	8.35285
Soltu.DM.03G011460.1	PAL	Soltu.DM.03G011460.1PAL	47.8397	39.6033	57.1395	94.4577	66.2813	73.147	329.644	866.404	529.073	678.105	252.601
Soltu.DM.03G011480.1	PAL	Soltu.DM.03G011480.1PAL	59.2935	93.0081	96.9845	88.3655	90.5096	61.0061	17.0161	85.0561	62.1905	31.3122	33.684
Soltu.DM.09G005710.1	PAL	Soltu.DM.09G005710.1PAL	35.9989	38.4526	43.9115	120.921	102.659	94.784	141.478	495.652	198.047	198.892	96.8166
Soltu.DM.10G020990.1	PAL	Soltu.DM.10G020990.1PAL	177.131	227.117	217.996	982.921	935.162	942.129	242.981	292.388	370.539	388.954	257.315
Soltu.DM.06G032850.1	C4H	Soltu.DM.06G032850.1C4H	82.8265	107.164	105.055	823.304	798.532	825.688	249.649	218.584	347.629	328.401	303.564
Soltu.DM.06G032860.1	C4H	Soltu.DM.06G032860.1C4H	48.9435	64.21	57.591	543.234	553.677	546.893	126.255	120.109	184.317	177.576	166.628
Soltu.DM.11G022420.1	4CL	Soltu.DM.11G022420.14CL	9.58503	8.56937	8.13537	28.9155	31.2189	29.6828	15.7316	17.4578	19.8091	22.8601	14.0548
Soltu.DM.03G020790.1	4CL	Soltu.DM.03G020790.14CL	23.5538	20.8161	21.804	354.815	352.295	324.391	25.8662	24.7986	89.1962	82.8847	60.0739
Soltu.DM.03G032090.1	4CL	Soltu.DM.03G032090.14CL	86.2348	89.7818	105.837	164.732	153.708	134.802	61.3143	65.1941	84.7837	70.0526	53.4657
Soltu.DM.06G024540.1	4CL	Soltu.DM.06G024540.14CL	27.1837	22.5604	27.5963	52.7973	46.9582	43.1992	23.9649	27.1699	26.004	24.1255	18.9954
Soltu.DM.09G028560.1	CHS	Soltu.DM.09G028560.1CHS	0	0	0	1060.07	1184.13	1145.33	1390.58	1195.24	2779.22	2597.5	2318.42
Soltu.DM.05G023610.1	CHS	Soltu.DM.05G023610.1CHS	1.20961	1.87257	0.487582	1071.52	1241.84	1209.42	2981.22	2127.58	3909	3798.93	3773.76
Soltu.DM.08G011960.1	CHI	Soltu.DM.08G011960.1CHI	24.8767	18.9937	18.5112	14.9847	18.2326	16.5642	4.7565	4.74754	9.00885	11.5607	7.66515
Soltu.DM.06G034730.1	CHI	Soltu.DM.06G034730.1CHI	17.9343	21.1169	19.8525	22.9136	17.9957	19.8333	27.9568	33.9081	23.7959	34.1921	14.8606
Soltu.DM.05G022280.1	CHI	Soltu.DM.05G022280.1CHI	0.320632	0.741228	0.449399	928.859	1006.43	860.707	375.902	224.991	924.265	666.3	798.332
Soltu.DM.07G023150.1	CHI	Soltu.DM.07G023150.1CHI	2.56978	6.43477	5.52192	12.0168	10.5326	12.0705	21.161	15.8324	29.8158	26.173	30.4471
Soltu.DM.05G001950.1	CHI	Soltu.DM.05G001950.1CHI	8.09129	9.87329	9.41449	147.818	173.162	153.352	352.728	279.76	708.5	621.798	609.473
Soltu.DM.02G023850.1	F3H	Soltu.DM.02G023850.1F3H	0.797524	0.154205	1.21749	138.64	145.631	133.699	228.8	173.743	850.006	701.347	673.767
Soltu.DM.03G029340.1	F3'H	Soltu.DM.03G029340.1F3'H	0.401474	0.103707	0.315217	435.762	466.72	450.581	270.806	264.458	552.939	565.405	449.353
Soltu.DM.04G007720.1	F3'H	Soltu.DM.04G007720.1F3'H	19.7593	16.3396	12.7442	60.3411	68.8088	64.887	63.8987	58.4552	59.0886	60.4411	50.4958
Soltu.DM.11G020990.1	F3'5'H	Soltu.DM.11G020990.1F3'5'H	7.97771	1.92304	2.28805	2.5719	2.3756	3.00749	6.91803	12.3203	87.0272	66.677	43.6784
Soltu.DM.08G026700.1	ANS	Soltu.DM.08G026700.1ANS	2.75461	2.35859	0.682644	3.21953	3.47573	3.25638	19.3366	18.0881	148.683	121.944	110.459
Soltu.DM.02G024900.2	DFR	Soltu.DM.02G024900.2DFR	0.371467	0.862252	0.261886	15.6755	14.5212	14.6545	161.184	152.913	611.801	562.154	460.825
Soltu.DM.09G001300.1	GST	Soltu.DM.09G001300.1GST	116.722	117.585	105.496	206.075	192.261	197.257	95.1784	65.0877	150.163	113.993	108.21
Soltu.DM.06G000550.1	GST	Soltu.DM.06G000550.1GST	367.217	325.753	320.322	949.227	1019.07	1007.79	652.385	501.221	640.174	734.135	712.479
Soltu.DM.07G022440.1	GST	Soltu.DM.07G022440.1GST	1.20294	1.85505	2.95316	7.30799	7.42074	5.96255	50.3942	32.1509	36.1184	24.0337	41.647
Soltu.DM.02G020850.1	GST	Soltu.DM.02G020850.1GST	1.24288	0.383938	0	2.55069	3.0806	3.01485	27.9383	19.1987	226.959	166.816	164.627
Soltu.DM.01G041440.1	GST	Soltu.DM.01G041440.1GST	171.312	172.899	192.604	242.442	267.282	233.203	635.272	527.501	541.301	460.889	611.432
